# Supplementary material for: Deinbollia mosaic virus: a novel begomovirus infecting the sapindaceous weed Deinbollia borbonica in Kenya and Tanzania
Source: Springer Nature journal article supplement (doi:10.1007/s00705-016-3217-9), 2017-01-09

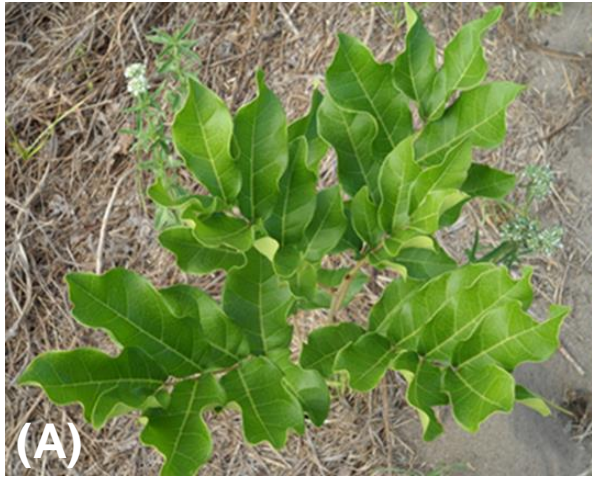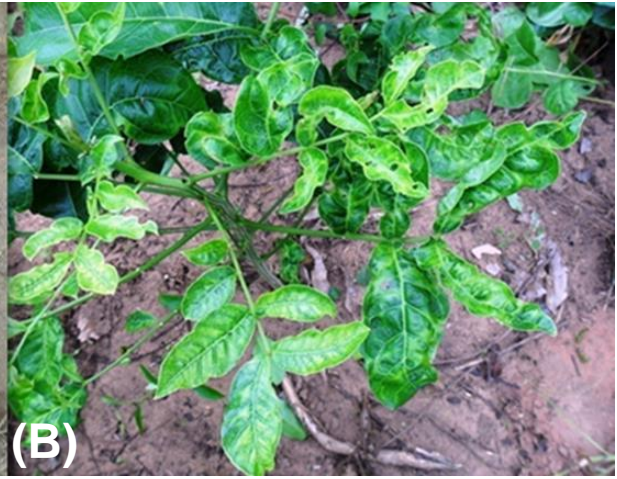

Supplement: MOESM1 [file 11986802]
