# Supplementary material for: Deinbollia mosaic virus: a novel begomovirus infecting the sapindaceous weed Deinbollia borbonica in Kenya and Tanzania
Source: Springer Nature journal article supplement (doi:10.1007/s00705-016-3217-9), 2017-01-09
Supplement: MOESM2 [file 11986802]

DMV\_KT878830  
 DMV\_KT878829  
 DMV\_KT878826  
 DMV\_KT878824  
 DMV\_KT8789138  
 TolCOYV\_AM701764  
 TolCAV\_EF194760  
 SACMV\_AF155806  
 EACMVV\_D658685  
 EACMVV\_AJ171572  
 EACMVV\_AJ171562  
 EACMVV\_AJ171541  
 ACMV\_I02057  
 CLOG6V\_AY1036006  
 TolCV\_AY192290  
 ICMV\_Z24758  
 JMV\_KF723258  
 BOV\_NB48770  
 ToChMV\_EU710754  
 PepGMV\_AY928516  
 AbMBV\_FN434438  
 EuMV\_F807782  
 BGMV\_AF110189  
 TolMV\_EU710752  
 SMMV\_AJ557451  
 BGYMV\_D00200

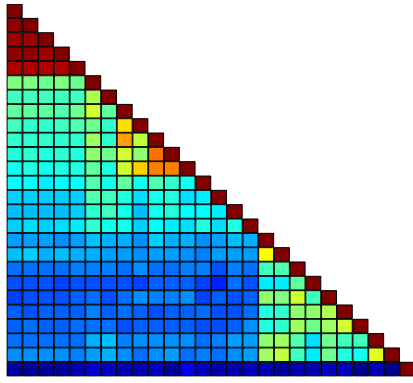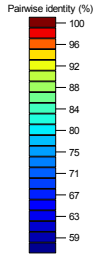

DMV\_KT878830  
 DMV\_KT878829  
 DMV\_KT878826  
 DMV\_KT878824  
 DMV\_KT8789138  
 TolCOYV\_AM701764  
 TolCAV\_EF194760  
 SACMV\_AF155806  
 EACMVV\_D658685  
 EACMVV\_AJ171572  
 EACMVV\_AJ171562  
 EACMVV\_AJ171541  
 ACMV\_I02057  
 CLOG6V\_AY1036006  
 TolCV\_AY192290  
 ICMV\_Z24758  
 JMV\_KF723258  
 BOV\_NB48770  
 ToChMV\_EU710754  
 PepGMV\_AY928516  
 AbMBV\_FN434438  
 EuMV\_F807782  
 BGMV\_AF110189  
 TolMV\_EU710752  
 SMMV\_AJ557451  
 BGYMV\_D00200
