# Supplementary material for: Deinbollia mosaic virus: a novel begomovirus infecting the sapindaceous weed Deinbollia borbonica in Kenya and Tanzania
Source: Springer Nature journal article supplement (doi:10.1007/s00705-016-3217-9), 2017-01-09
Supplement: MOESM3 [file 11986802]

Primers used in this study for plant species identification and virus diagnosis

| <b>Primer</b>          | <b>Sequence (5' → 3')</b>  | <b>Target</b> | <b>T<sub>a</sub> (°C)</b> |
|------------------------|----------------------------|---------------|---------------------------|
| rbcLa-F <sup>1</sup>   | ATGTCACCACAAACAGAGACTAAAGC | Chloroplast   | 56                        |
| rbcLa-R <sup>1</sup>   | GTAAAA TCA AGT CCA CCR CG  | Chloroplast   | 56                        |
| CRA/F <sup>2a</sup>    | TGTTGACAGGTGTTTGTGTTTGC    | Rep           | 60                        |
| CRA/R <sup>2a</sup>    | ATCACGAATTAGATCATGGCCC     | MP            | 60                        |
| DNA-A1/F <sup>2a</sup> | ACGCCATTCTGTGCCTGAGGA      | TrAP/REn      | 60                        |
| DNA-A1/R <sup>2a</sup> | GGACGGCGACACAACCAGCT       | Rep/AC4       | 60                        |
| DNA-A2/F <sup>2a</sup> | ACTCATCGTGTTCGGGAAGAGGT    | CP            | 60                        |
| DNA-A2/R <sup>2a</sup> | CAAGTGAGACGCAGAGGTCCCA     | Rep/TrAP      | 60                        |
| DNA-A3/F <sup>2a</sup> | TCCTGACTCGGTGCATGGGT       | MP            | 60                        |
| DNA-A3/R <sup>2a</sup> | ACCTGTCCAAAATCTTGTGGGC     | CP            | 60                        |
| DNA-A4/F <sup>2a</sup> | ATAGCACCGTCGGCAGAACC       | Rep           | 60                        |
| DNA-A4/R <sup>2a</sup> | AGTTGCCCTCCGTTCCACCG       | CR            | 60                        |
| CRB/F <sup>2a</sup>    | CCTTCCATTGCTGTTGTTTGCT     | CR/MP         | 60                        |
| CRB/R <sup>2a</sup>    | TGGCCCAATAAAAACAAGCCCA     | CR            | 60                        |
| DNA-B1/F <sup>2a</sup> | CTGACTGGGCCTGGGATGCG       | MP            | 60                        |
| DNA-B1/R <sup>2a</sup> | ACTAACACACGATGCGGCTCCT     | MP            | 60                        |
| DNA-B2/F <sup>2a</sup> | CTTGTGCTGCTTCCTCTTGGCT     | MP            | 60                        |
| DNA-B2/R <sup>2a</sup> | GTTGCCCTCCGTTCCACCGA       | CR            | 60                        |
| DNA-B3/F <sup>2a</sup> | ATGCTCGGCGATCTATAGAGGA     | NSP           | 60                        |
| DNA-B3/R <sup>2a</sup> | TCAACAGCACTCGACCCAGGC      | MP            | 60                        |
| DNA-B4/F <sup>2a</sup> | TTGGCTCTCAGGTGTCCACGT      | CR            | 60                        |
| DNA-B4/R <sup>2a</sup> | ACGACCTCCATTACCTTCAACA     | NSP           | 60                        |

<sup>1</sup>Barcode primers used for amplification of rubisco gene for plant species identification.

<sup>2</sup>Overlapping primers used for generating PCR products for Sanger sequencing to validate NGS data.

<sup>a</sup>Primers designed for the current study.
