# Supplementary material for: Deinbollia mosaic virus: a novel begomovirus infecting the sapindaceous weed Deinbollia borbonica in Kenya and Tanzania
Source: Springer Nature journal article supplement (doi:10.1007/s00705-016-3217-9), 2017-01-09
Supplement: MOESM4 [file 11986802]

**Predicted open reading frames in DNA-A and DNA-B of DMV**

| <b>Isolate</b> | <b>Origin</b> | <b>Genomic component</b> | <b>ORF</b> | <b>Length (bp)</b> | <b>Start/Stop Codon (nt)</b> |
|----------------|---------------|--------------------------|------------|--------------------|------------------------------|
| DB_K1          | Kenya         | DNA-A<br>2,758 nt        | V1 (CP)    | 777                | 314/1,090                    |
|                |               |                          | V2 (MP)    | 351                | 154/504                      |
|                |               |                          | C1 (Rep)   | 1,095              | 1,533/2,627                  |
|                |               |                          | C2 (TrAP)  | 438                | 1,232/1,669                  |
|                |               |                          | C3 (REn)   | 405                | 1,087/1,491                  |
|                |               |                          | C4         | 240                | 2,213/2,452                  |
|                |               |                          | DNA-B      | 765                | 457/1,221                    |
| DB_T1          | Tanzania      | DNA-A<br>2,759 nt        | V1 (CP)    | 777                | 315/1,091                    |
|                |               |                          | V2 (MP)    | 351                | 155/505                      |
|                |               |                          | C1 (Rep)   | 1,095              | 1,534/2,628                  |
|                |               |                          | C2 (TrAP)  | 438                | 1,233/1,670                  |
|                |               |                          | C3 (REn)   | 405                | 1,088/1,492                  |
|                |               |                          | C4         | 240                | 2,214/2,453                  |
|                |               |                          | DNA-B      | 765                | 452/1,216                    |
| DB_T2          | Tanzania      | DNA-A<br>2,702 nt        | C1 (MP)    | 852                | 1,253/2,104                  |
|                |               |                          | V1 (CP)    | 777                | 314/1,090                    |
|                |               |                          | V2 (MP)    | 351                | 154/504                      |
|                |               |                          | C1 (Rep)   | 1,095              | 1,533/2,627                  |
|                |               |                          | C2 (TrAP)  | 447                | 1,232/1,678                  |
|                |               |                          | C3 (REn)   | 405                | 1,087/1,491                  |
|                |               |                          | C4         | 240                | 2,213/2,452                  |
| DB_T3          | Tanzania      | DNA-B<br>2,702 nt        | V1 NSP)    | 765                | 453/1,217                    |
|                |               |                          | C1 (MP)    | 924                | 1,254/2,177                  |
|                |               |                          | DNA-A      | 777                | 314/1,090                    |
|                |               |                          | V2 (MP)    | 351                | 154/504                      |
|                |               |                          | C1 (Rep)   | 1,095              | 1,533/2,627                  |
|                |               |                          | C2 (TrAP)  | 438                | 1,232/1,669                  |
|                |               |                          | C3 (REn)   | 405                | 1,087/1,491                  |
| DB_T3          | Tanzania      | DNA-A<br>2,758 nt        | C4         | 240                | 2,213/2,452                  |
|                |               |                          | V1 NSP)    | 765                | 453/1,217                    |
|                |               |                          | C1 (MP)    | 948                | 1,254/2,201                  |
